# Supplementary material for: Correction: Improved Methodical Approach for Quantitative BRET Analysis of G Protein Coupled Receptor Dimerization
Source: PubMed Central journal article supplement (PMC4887035; doi:10.1371/journal.pone.0156824), 2016-05-31

### V<sub>2</sub>R-RLuc

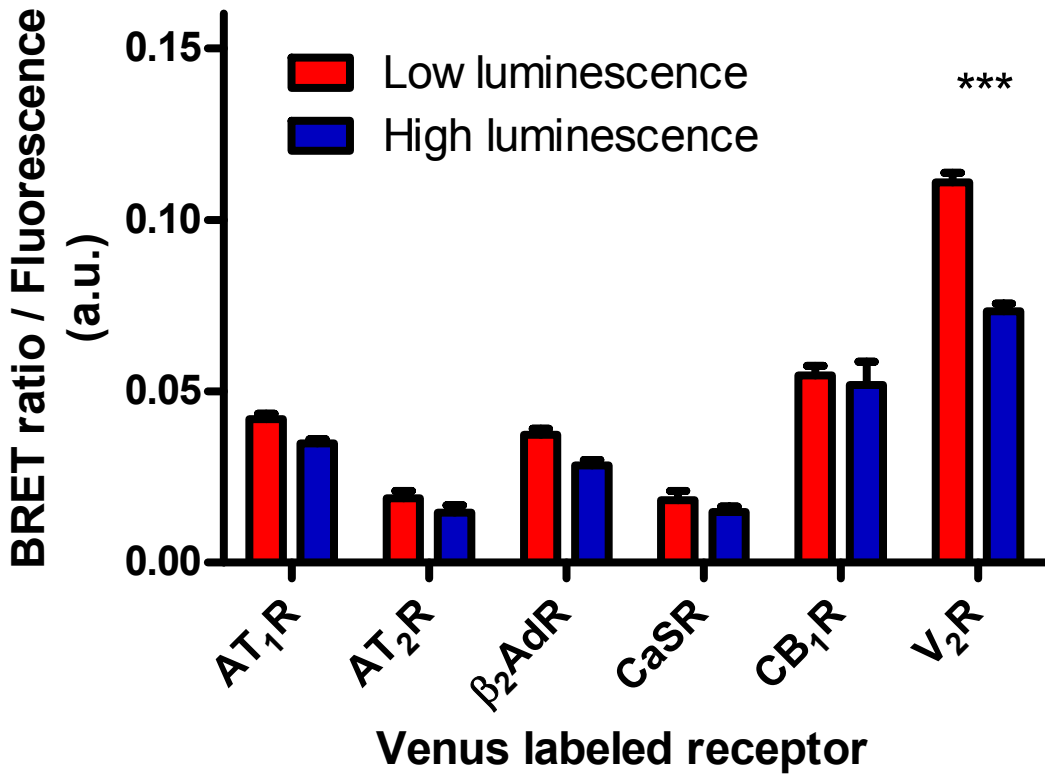

### CaSR-RLuc

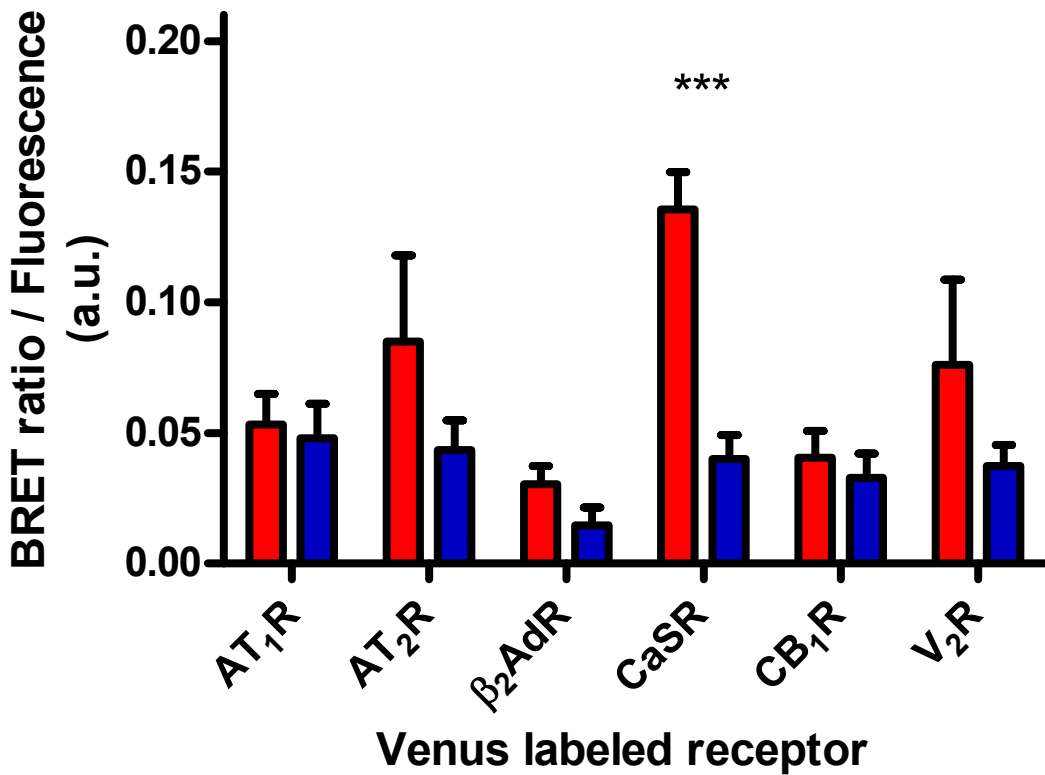

Supplement: pone.0156824.s003.pdf [file pone.0156824.s003.pdf]
